# Supplementary material
Source: MDPI journal article supplement (https://www.mdpi.com/2311-553X/9/2/25)
Supplement: s1 [file s1]

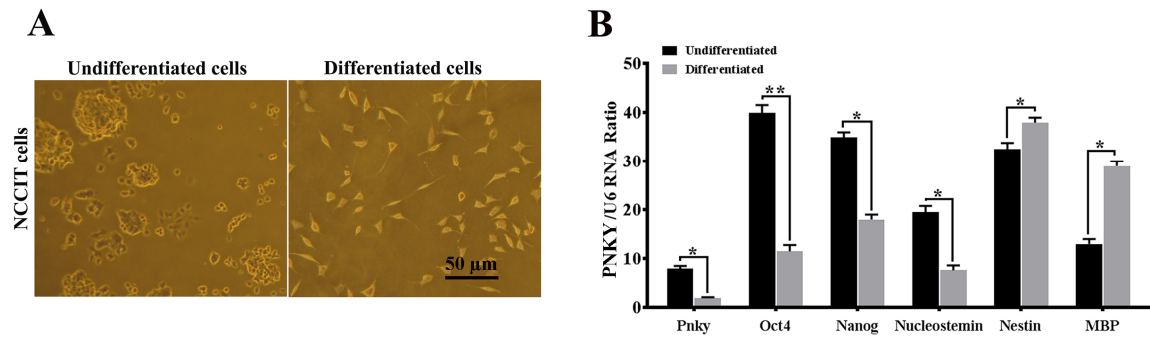

**Supplementary Figure S1:** PNKY expression is downregulated during neural differentiation. (A) undifferentiated (left) and differentiated (right) NCCIT cells. (B) The expression level of PNKY, like the expression level of stemness factors including Oct4/ Nanog /Nucleostemin, is downregulated during differentiation of NCCIT cells. The values shown represent the mean  $\pm$  SE. \*  $p$  value < 0.05, \*\*  $p$  value < 0.01.
